# Supplementary material for: Identification of conserved transcriptome features between humans and Drosophila in the aging brain utilizing machine learning on combined data from the NIH Sequence Read Archive
Source: PLoS One. 2021 Aug 11;16(8):e0255085. doi: 10.1371/journal.pone.0255085 (PMC8357136; doi:10.1371/journal.pone.0255085)
Supplement: S3 Table — This table depicts the average accuracy, F1, Precision, and Recall scores for classifying samples into their age groups. The data contained in these tables represents average scores across 1000 iterations of training/testing predictions. Each row represents a different way to select genetic features for age prediction, where each column represents the metric used for evaluating the effectiveness in age group classification. (XLSX) [file pone.0255085.s003.xlsx]

## Sheet: Sup. Table 3
	Human Age Classification Results - XGB								Drosophila Age Classification Results - XGB
	Dataset	Number of Genes	Mean Accuracy	Mean True Positive	Mean True Negative	Mean False Positive	Mean False Negative		Dataset	Number of Genes	Mean Accuracy	Mean True Positive	Mean True Negative	Mean False Positive	Mean False Negative
	All Human Genes	16880	0.8	23	46	6	12		All Fly Genes	9651	0.93	25	50	2	4
	Human Age-Correlated Genes	1000	0.81	24	47	5	11		Fly Age-Correlated Genes	1000	0.92	25	50	2	4
	Homologous Age-Correlated Genes	50	0.69	20	40	9	18		Homologous Age-Correlated Genes	49	0.88	24	47	3	7
